# Supplementary material
Source: MDPI journal article supplement (https://www.mdpi.com/2073-4395/11/3/457)
Supplement: s1 [file s1]

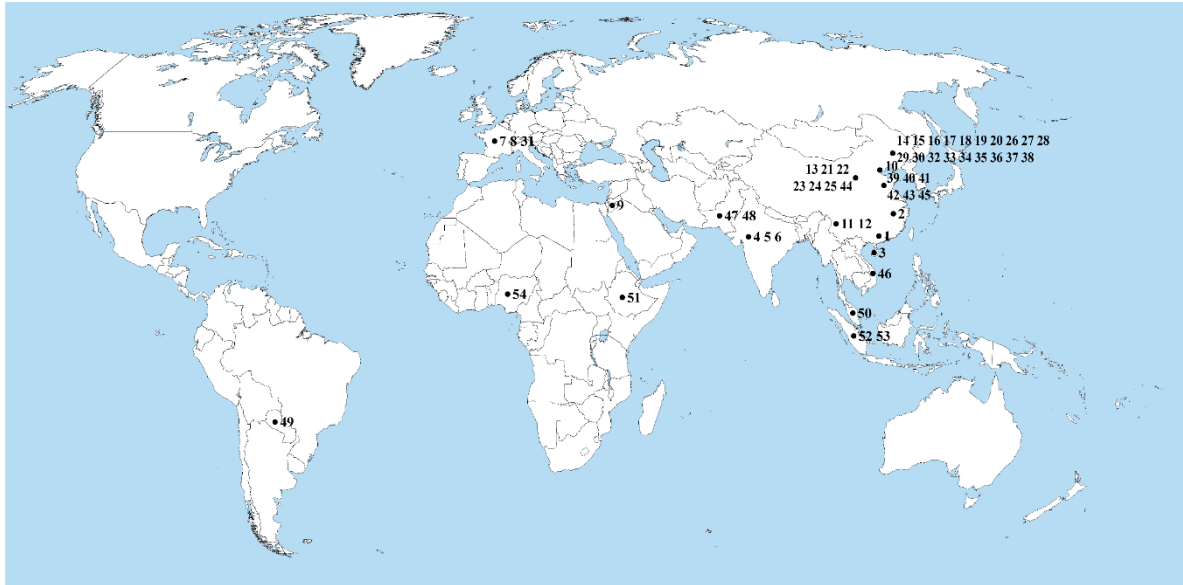

**Figure S1.** Global distribution of the 54 *R. communis* L. seed accessions used in this study. The sample numbers are listed in Table 1.
