# Supplementary material
Source: MDPI journal article supplement (https://www.mdpi.com/2073-4395/11/3/457)
Supplement: s1 [file s1]

Archive with 2 entries (2 files):
- Figure S1-agronomy-1107650.pdf
- Table S1-agronomy-1107650-1.xlsx
